# Supplementary material
Source: PubMed Central journal article supplement (PMC5135018)

**a** A diagram for image cropping in panels b and c

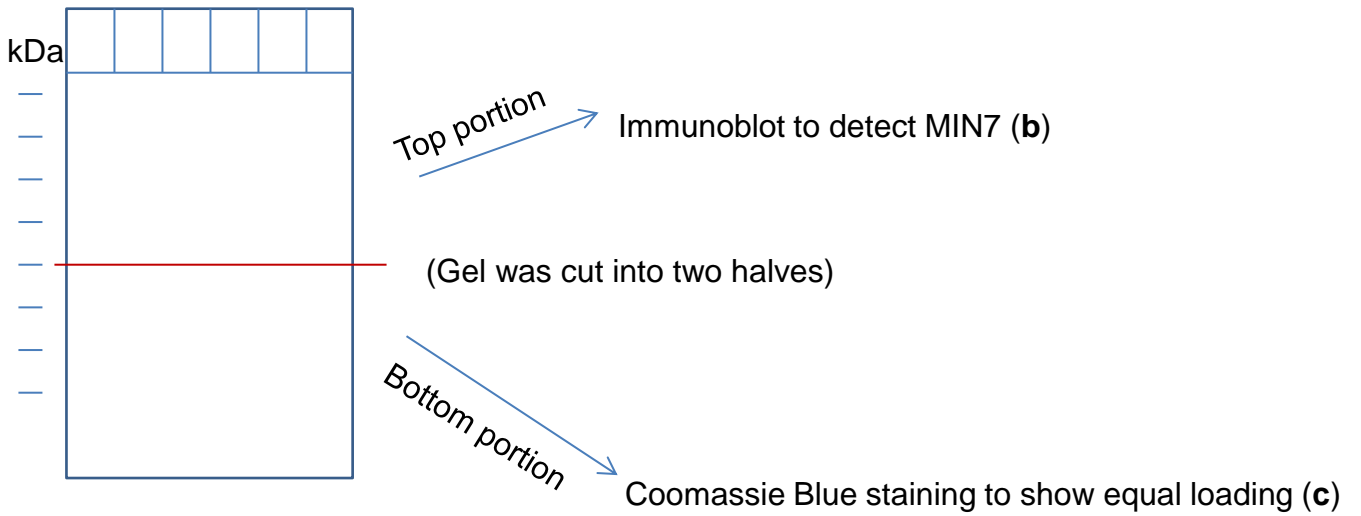

**b** For Figure 3d (upper panel)

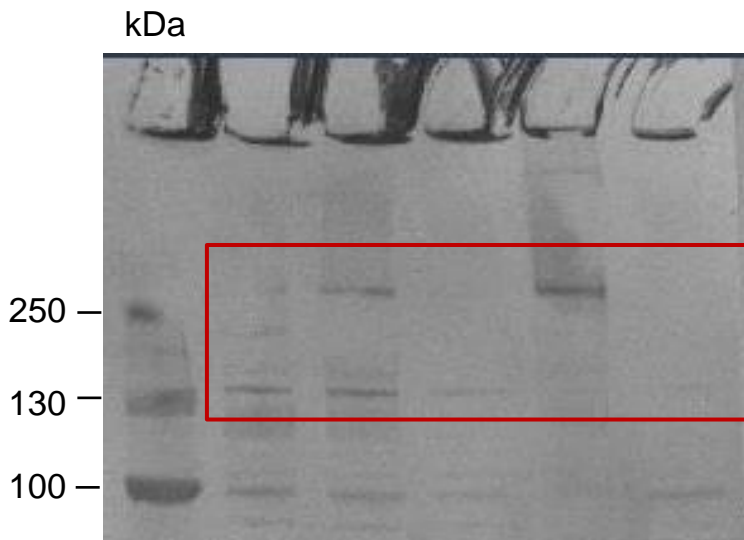

**c** For Figure 3d (lower panel)

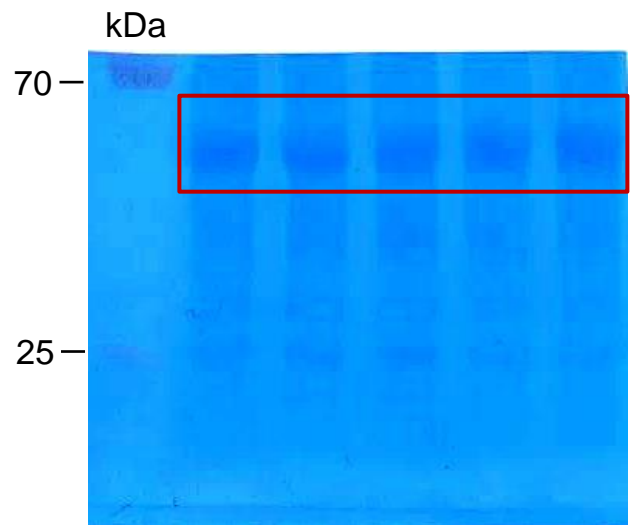

**d** For Extended Data Figure 6b

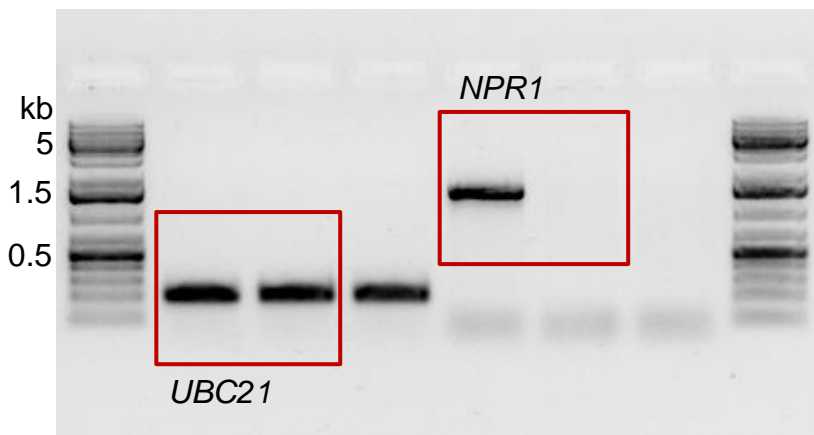

Supplement: NIHMS829950-supplement-01.pdf [file NIHMS829950-supplement-01.pdf]
